# Supplementary material
Source: PubMed Central journal article supplement (PMC3635492)

## **Supporting material II**

Integrated CZE-ESI-MS/MS system with an immobilized trypsin  
microreactor for online digestion and analysis of picogram amounts of RAW  
264.7 cell lysate

Liangliang Sun, Guijie Zhu, Norman J. Dovichi

Department of Chemistry and Biochemistry, University of Notre Dame, Notre Dame, IN  
46556, USA

**Part I S-Figure 1 and S-Figure 2**

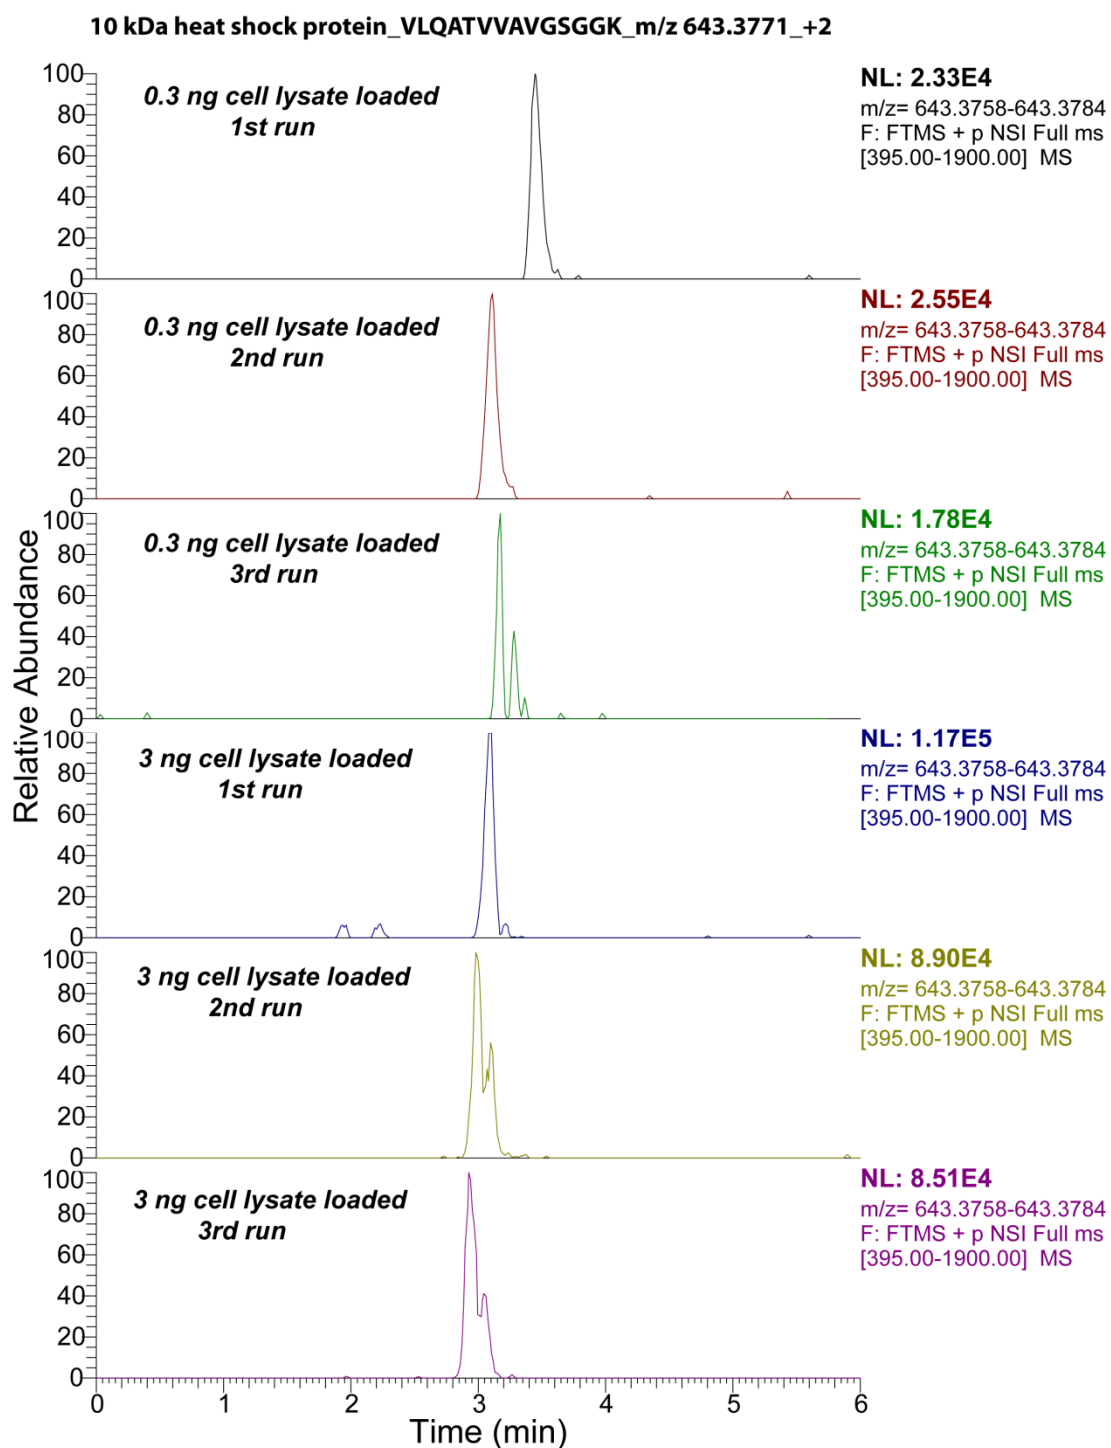

**S-Figure 1** Triplicate extracted ion electropherograms of a peptide (VLQATVVAVGSGGK) that was only identified in the tandem spectra from 0.3 ng cell lysate. The peptide's ion intensity was extracted with mass tolerance as 2 ppm, and Gaussian smoothing with 5 points was applied.

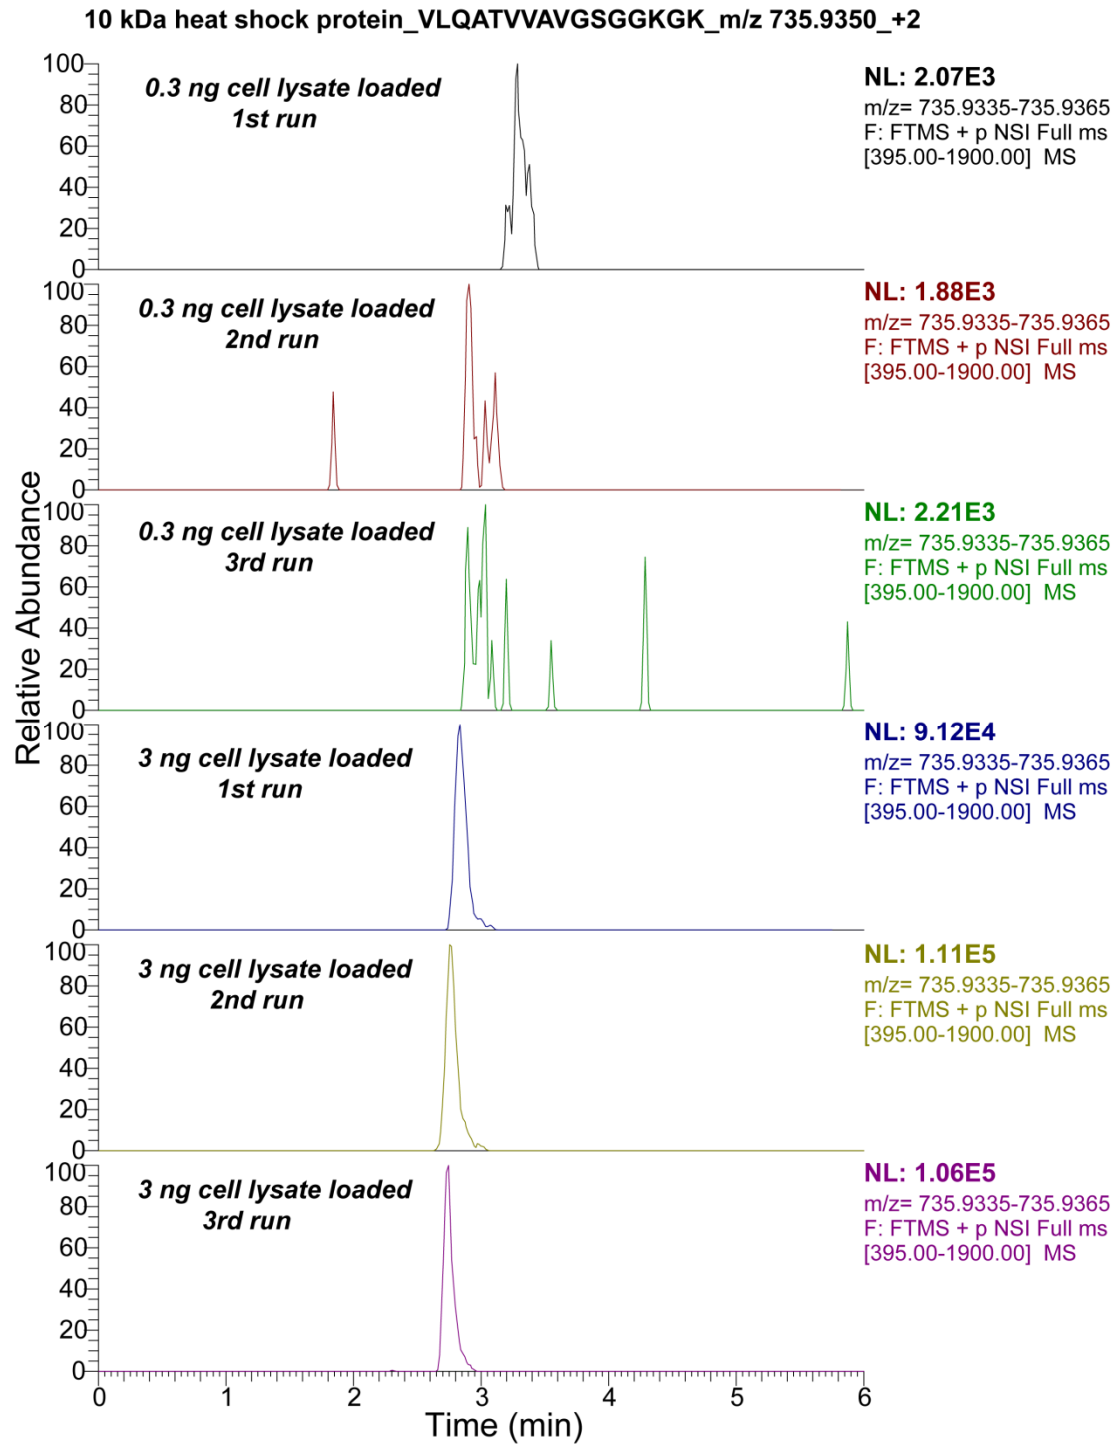

**S-Figure 2** Triplicate extracted ion electropherograms of a peptide (VLQATVVAVGSGGK) that was only identified in the tandem spectra from 3 ng cell lysate. The peptide was extracted with mass tolerance as 2 ppm, and Gaussian smoothing with 5 points was applied.

**Part II Annotated tandem spectra of identified peptides from 0.3 ng and 3 ng RAW 264.7 cell lysate analyzed by the integrated CZE-ESI-MS/MS system in triplicate runs**

# 0.3 ng RAW 264.7 cell lysate\_1st run

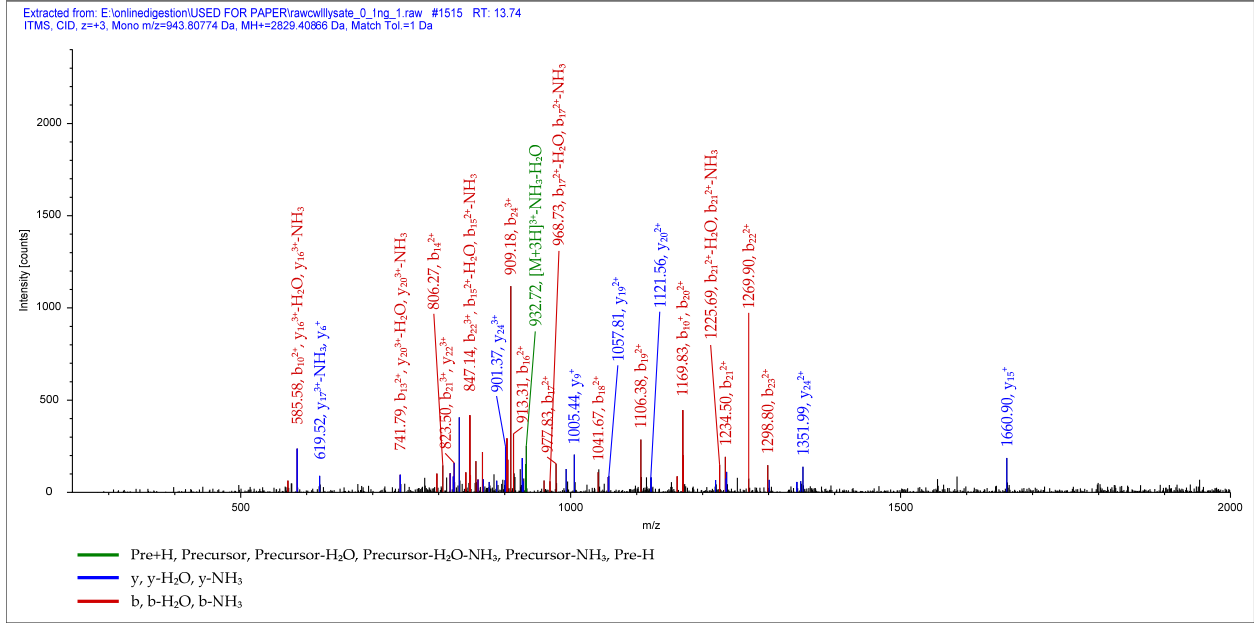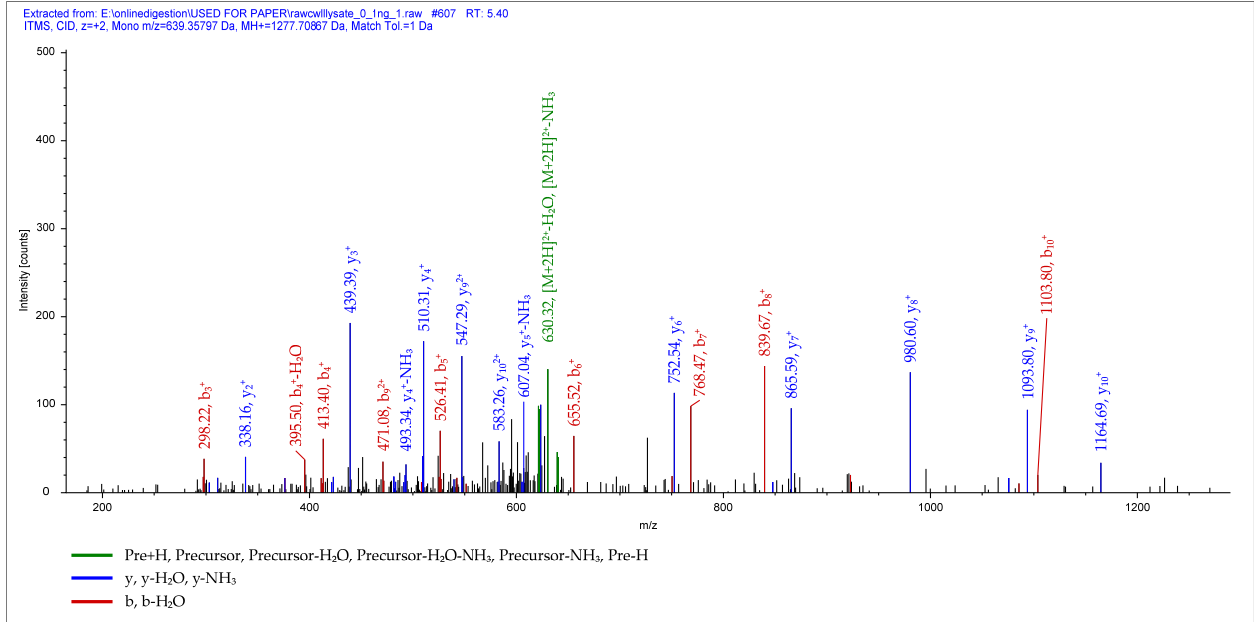

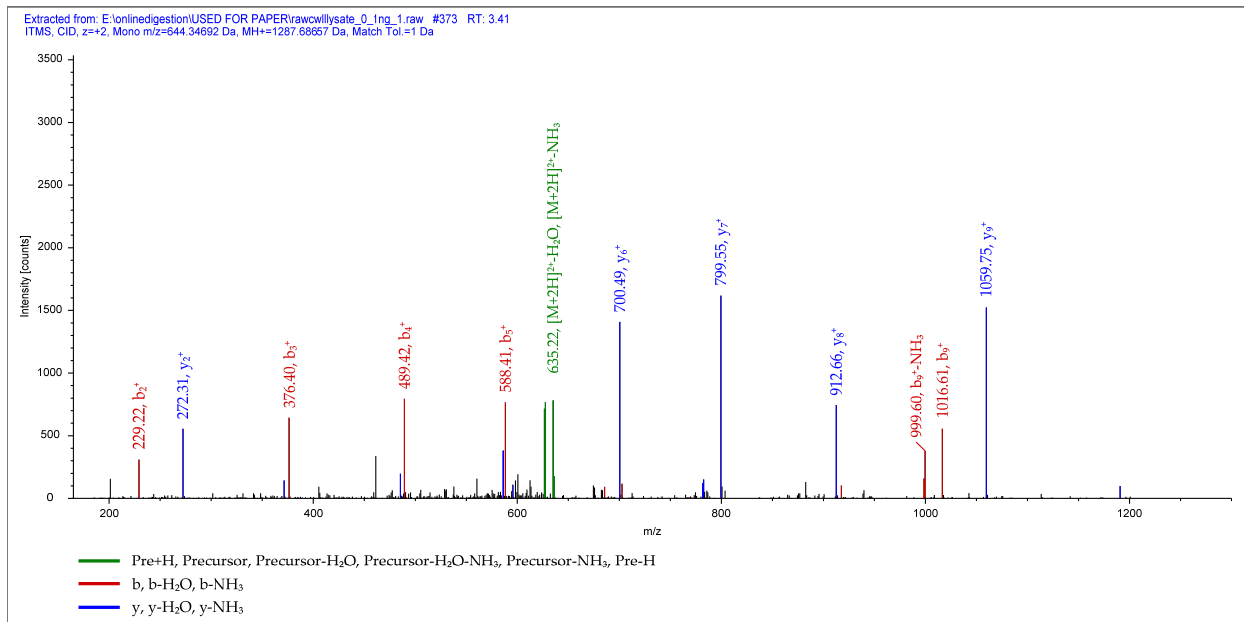

### 0.3 ng RAW 264.7 cell lysate\_2nd run

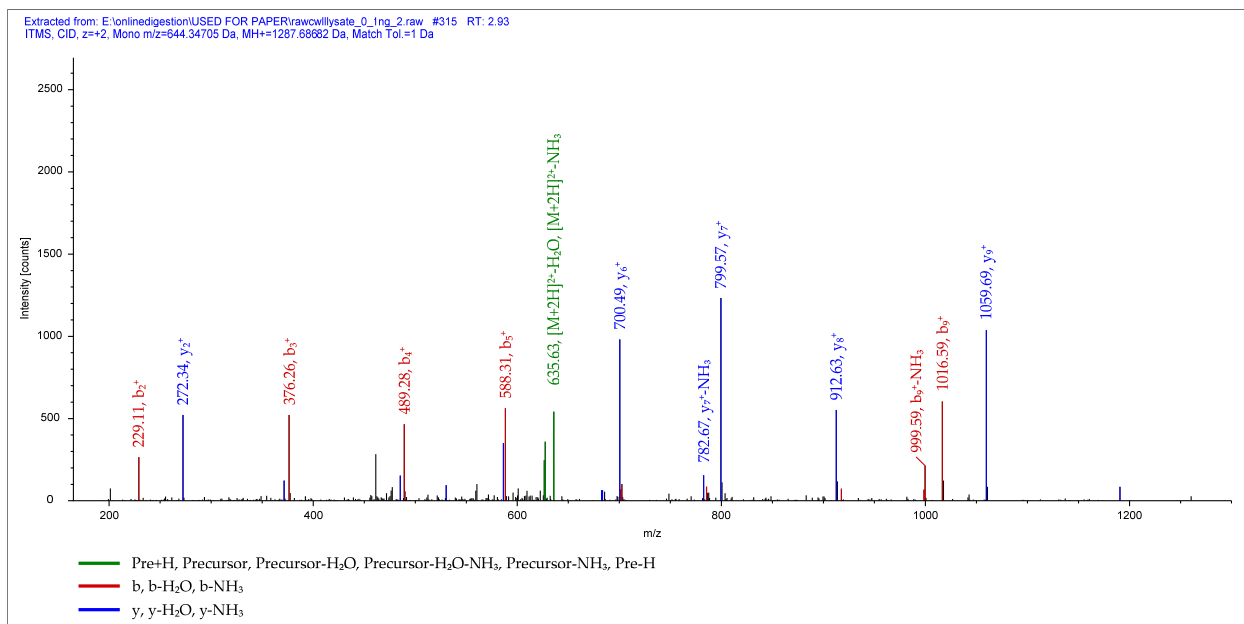

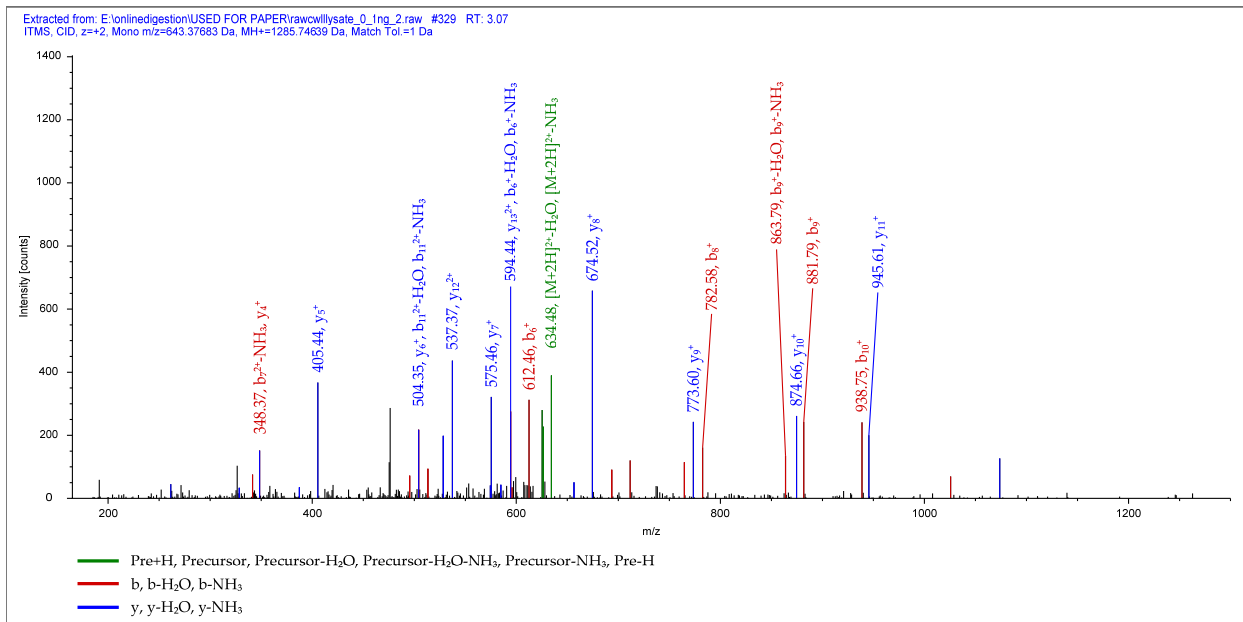

### 0.3 ng RAW 264.7 cell lysate\_3rd run

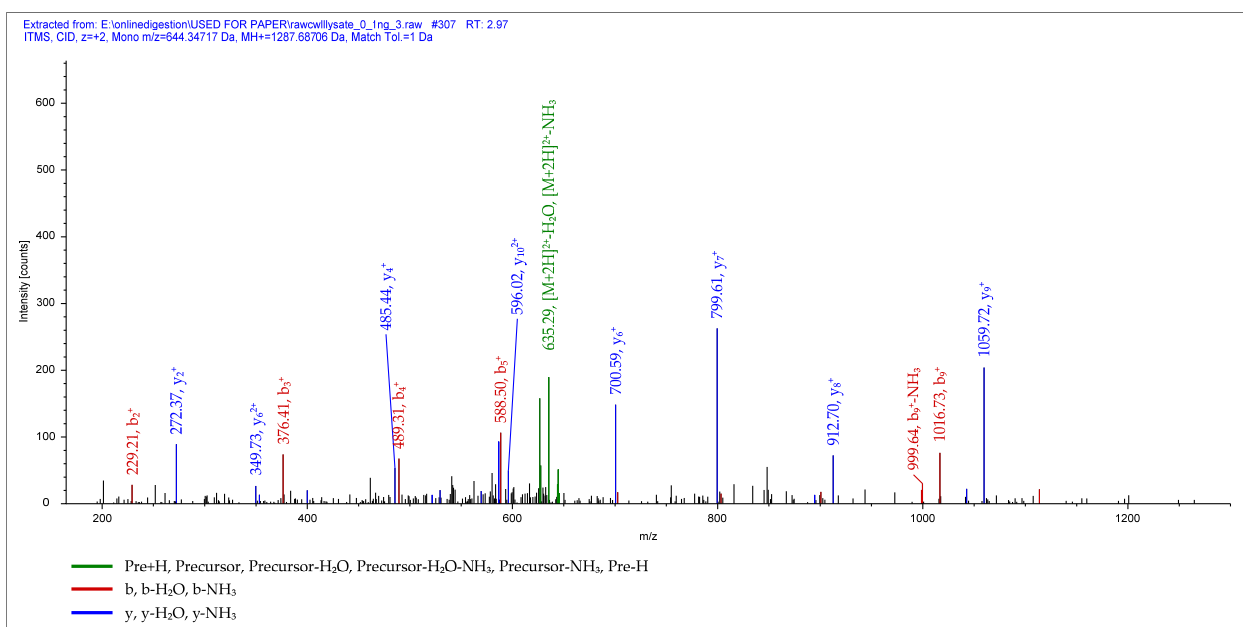

### 3 ng RAW 264.7 cell lysate\_1st run

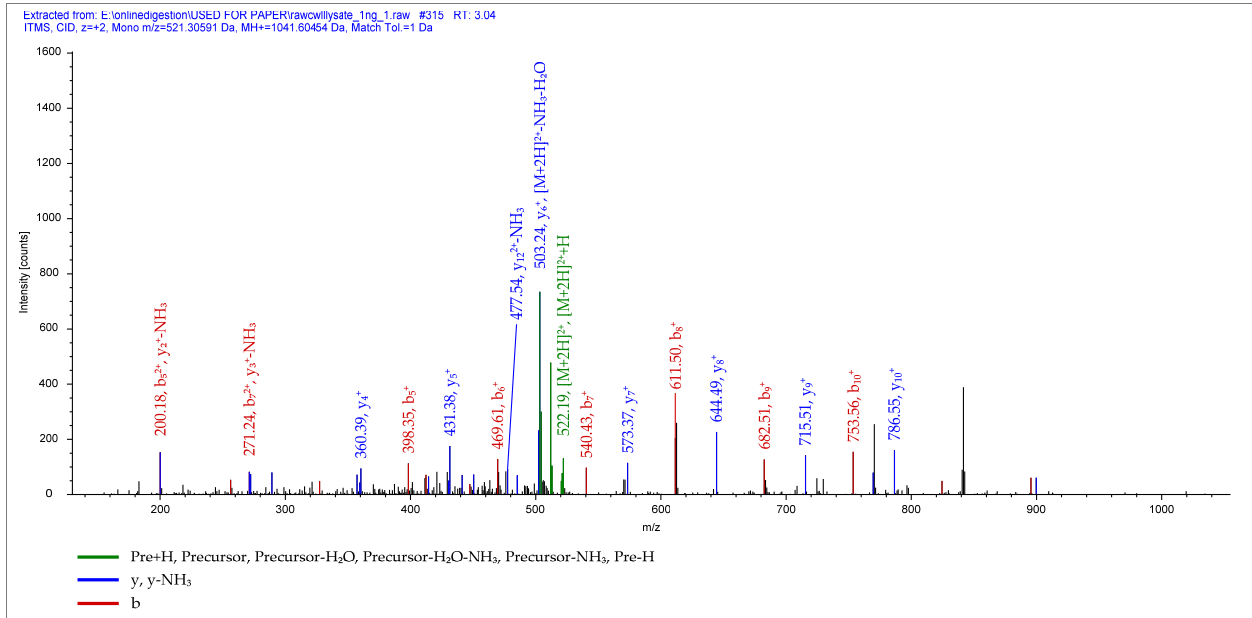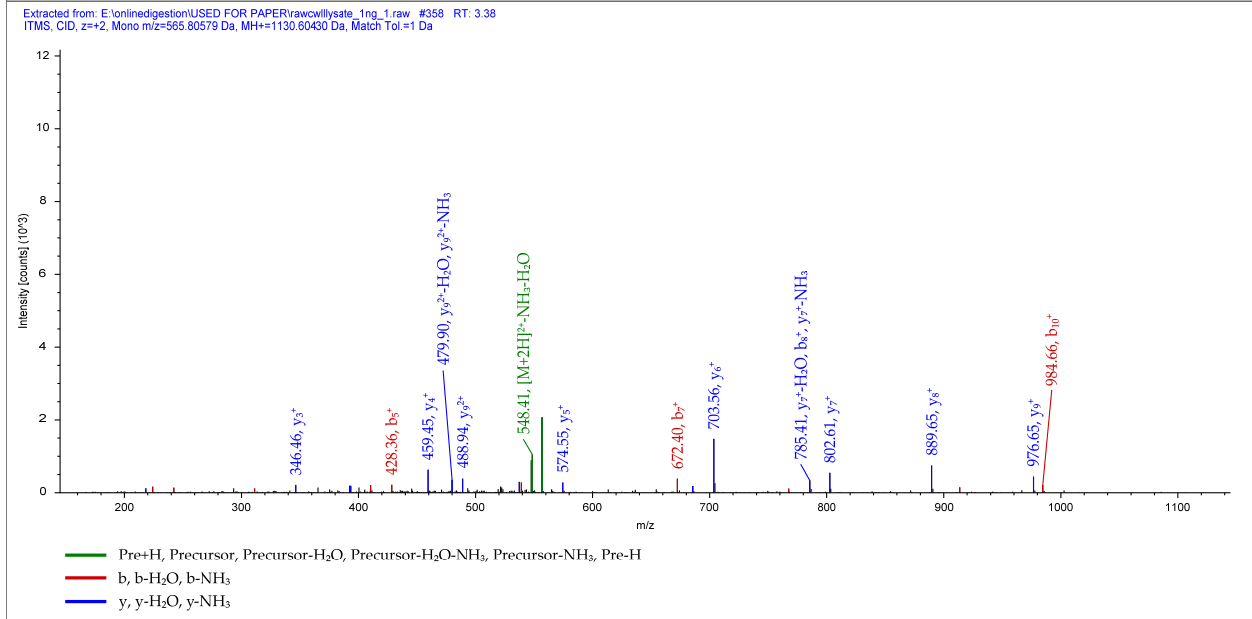



Extracted from: E:\onlinedigestion\USED FOR PAPER\rawcwllylsate\_1ng\_1.raw #481  
ITMS, CID, z=+3, Mono m/z=943.80908 Da, MH+=2829.41269 Da, Match Tol.=1 Da

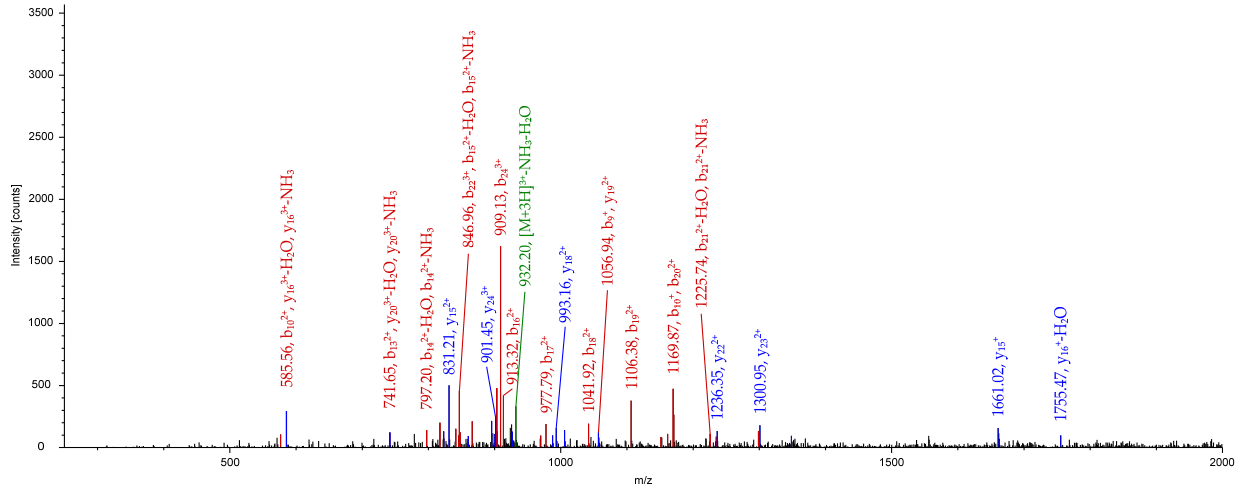

— Pre+H, Precursor, Precursor-H<sub>2</sub>O, Precursor-H<sub>2</sub>O-NH<sub>3</sub>, Precursor-NH<sub>3</sub>, Pre-H  
— y, y-H<sub>2</sub>O, y-NH<sub>3</sub>  
— b, b-H<sub>2</sub>O, b-NH<sub>3</sub>

Extracted from: E:\onlinedigestion\USED FOR PAPER\rawcwllylsate\_1ng\_1.raw #319 RT: 3.06  
ITMS, CID, z=+2, Mono m/z=500.31250 Da, MH+=999.61772 Da, Match Tol.=1 Da

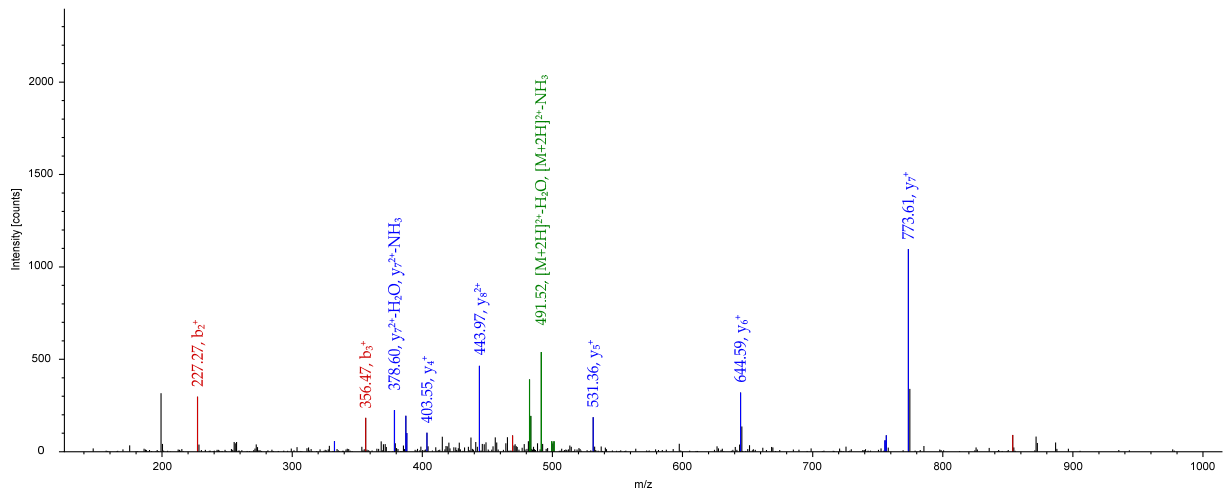

— Pre+H, Precursor, Precursor-H<sub>2</sub>O, Precursor-H<sub>2</sub>O-NH<sub>3</sub>, Precursor-NH<sub>3</sub>, Pre-H  
— b, b-H<sub>2</sub>O, b-NH<sub>3</sub>  
— y, y-H<sub>2</sub>O, y-NH<sub>3</sub>

Extracted from: E:\onlinedigestion\USED FOR PAPER\rawcowllylsate\_1ng\_1.raw #284 RT: 2.86  
ITMS, CID, z=+2, Mono m/z=644.34821 Da, MH+=1287.68913 Da, Match Tol.=1 Da

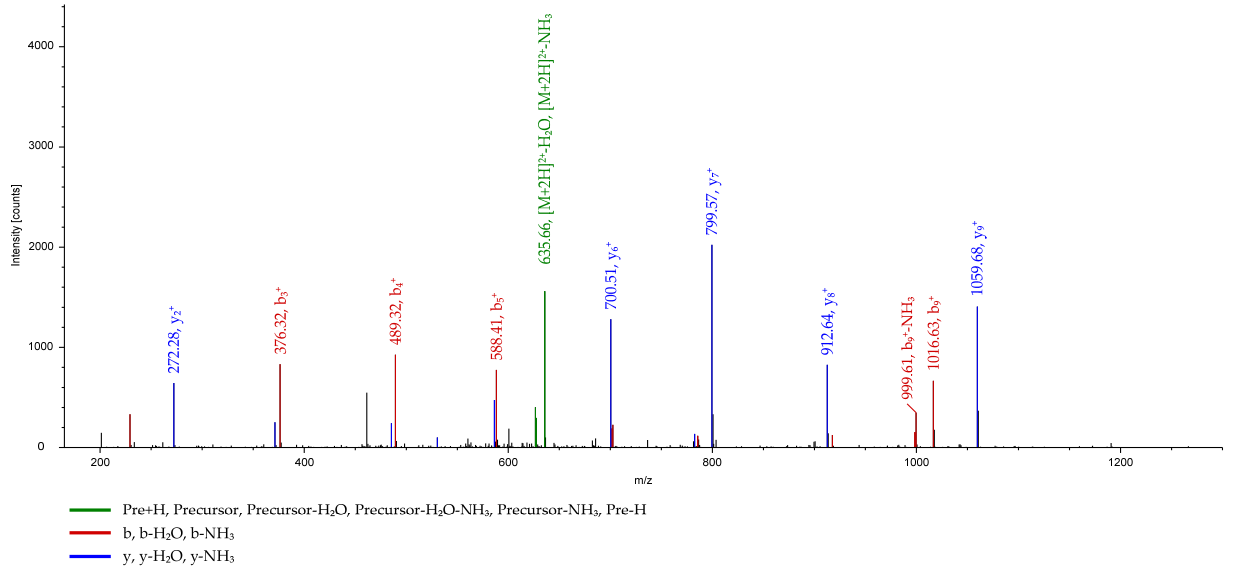

Extracted from: E:\onlinedigestion\USED FOR PAPER\rawcowllylsate\_1ng\_1.raw #383 RT: 3.54  
ITMS, CID, z=+3, Mono m/z=843.76891 Da, MH+=2529.28617 Da, Match Tol.=1 Da

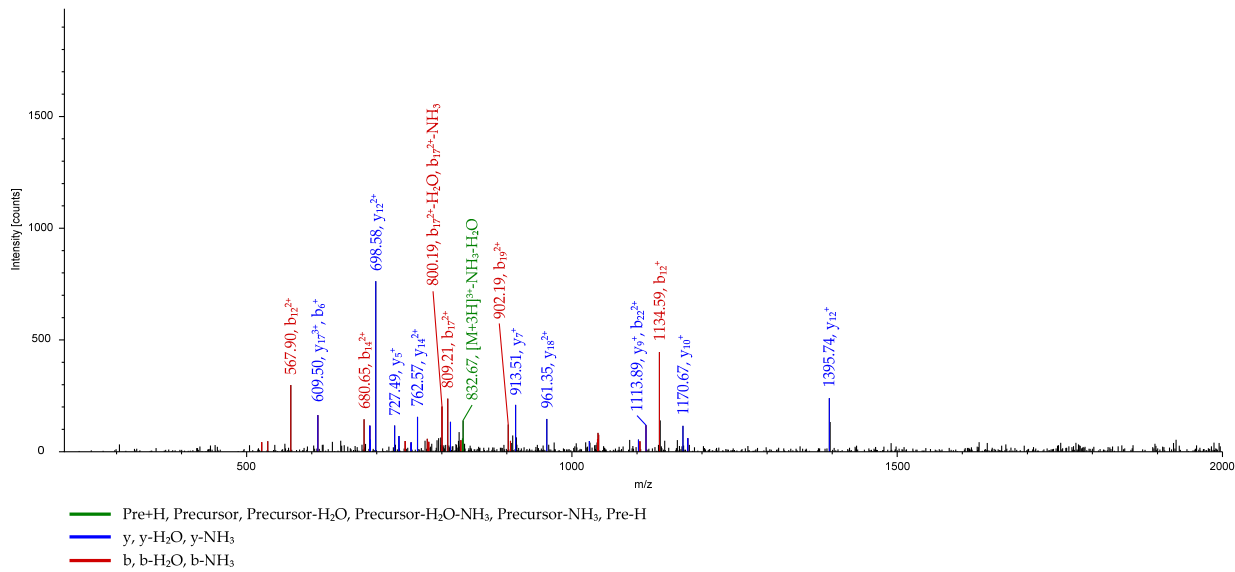

Extracted from: E:\onlinedigestion\USED FOR PAPER\rawcwllylate\_1ng\_1.raw #417 RT: 3.87  
ITMS, CID, z=+2, Mono m/z=403.71640 Da, MH+=806.42552 Da, Match Tol.=1 Da

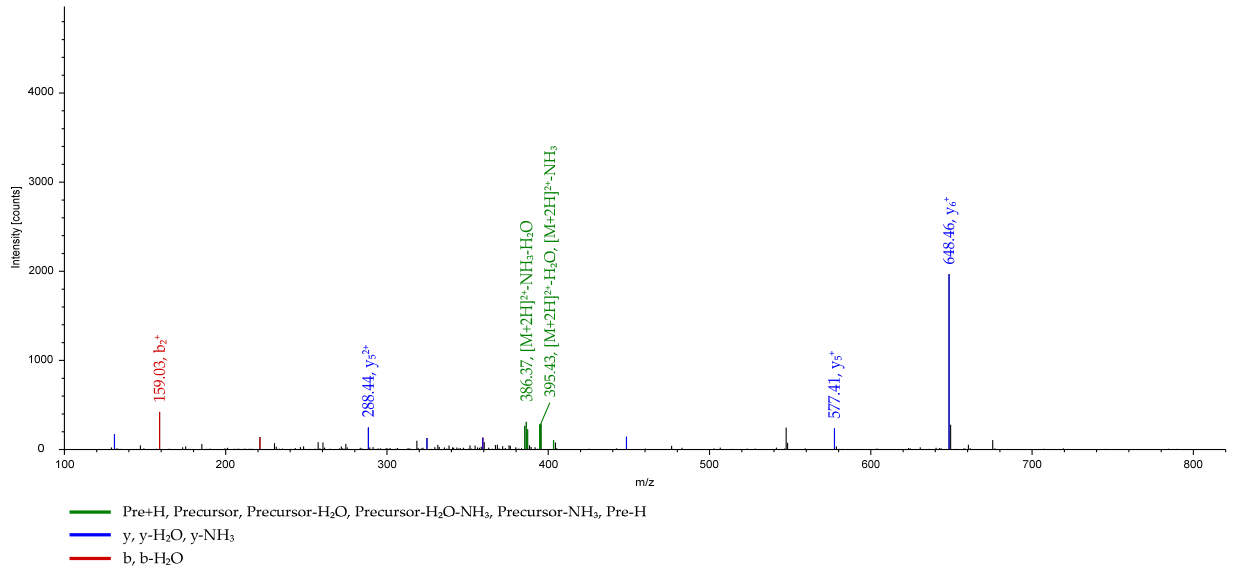

Extracted from: E:\onlinedigestion\USED FOR PAPER\rawcwllylate\_1ng\_1.raw #139 RT: 1.49  
ITMS, CID, z=+3, Mono m/z=901.10901 Da, MH+=2701.31247 Da, Match Tol.=1 Da

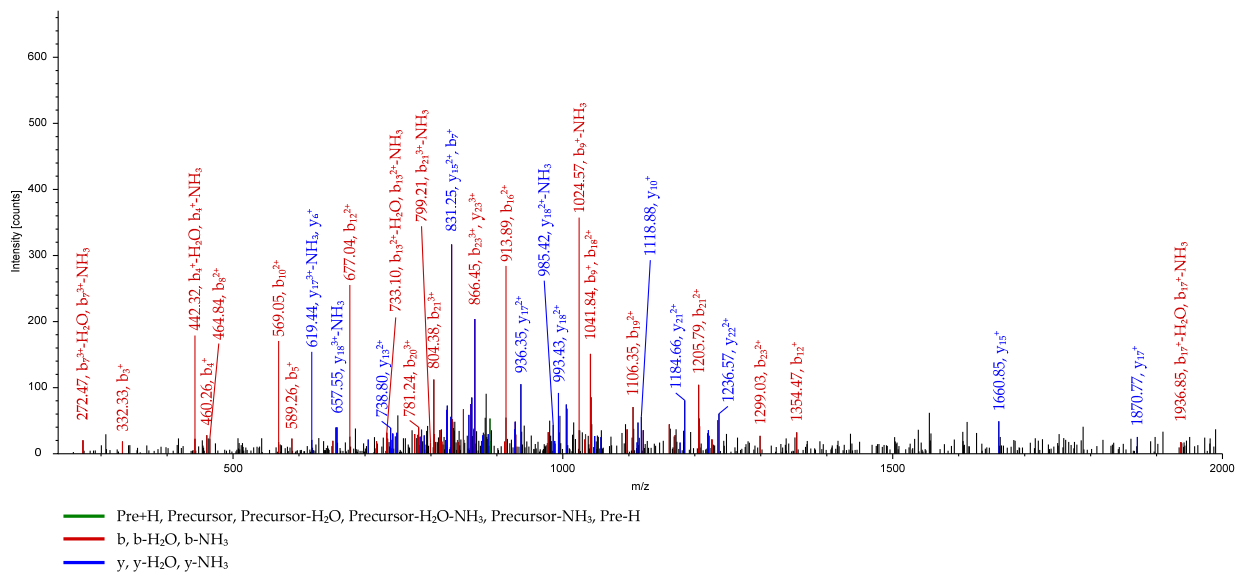

Extracted from: E:\onlinedigestion\USED FOR PAPER\rawcwllylate\_1ng\_1.raw #399 RT: 3.69  
ITMS, CID, z=+3, Mono m/z=1027.53162 Da, MH+=3080.58030 Da, Match Tol.=1 Da

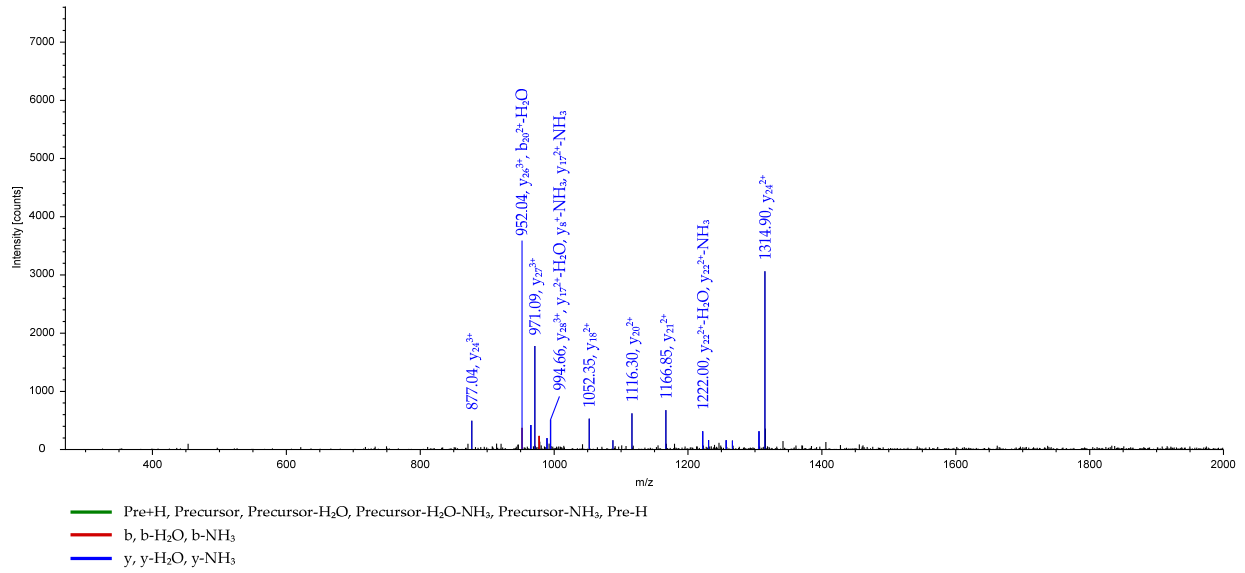

Extracted from: E:\onlinedigestion\USED FOR PAPER\rawcwllylate\_1ng\_1.raw #266 RT: 2.78  
ITMS, CID, z=+2, Mono m/z=735.93536 Da, MH+=1470.86345 Da, Match Tol.=1 Da

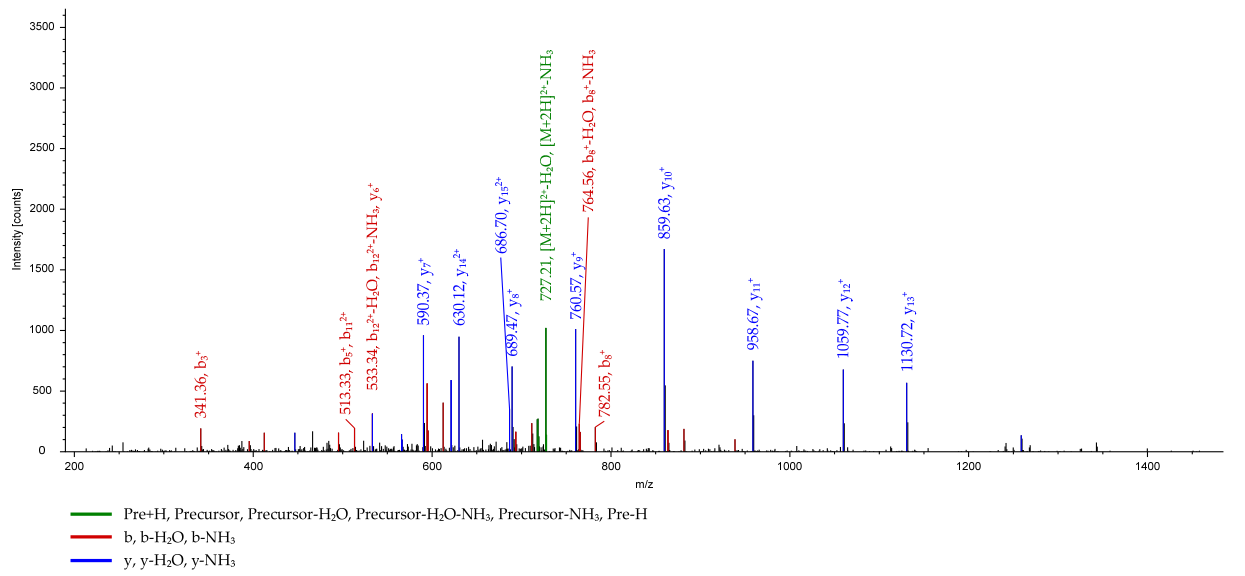

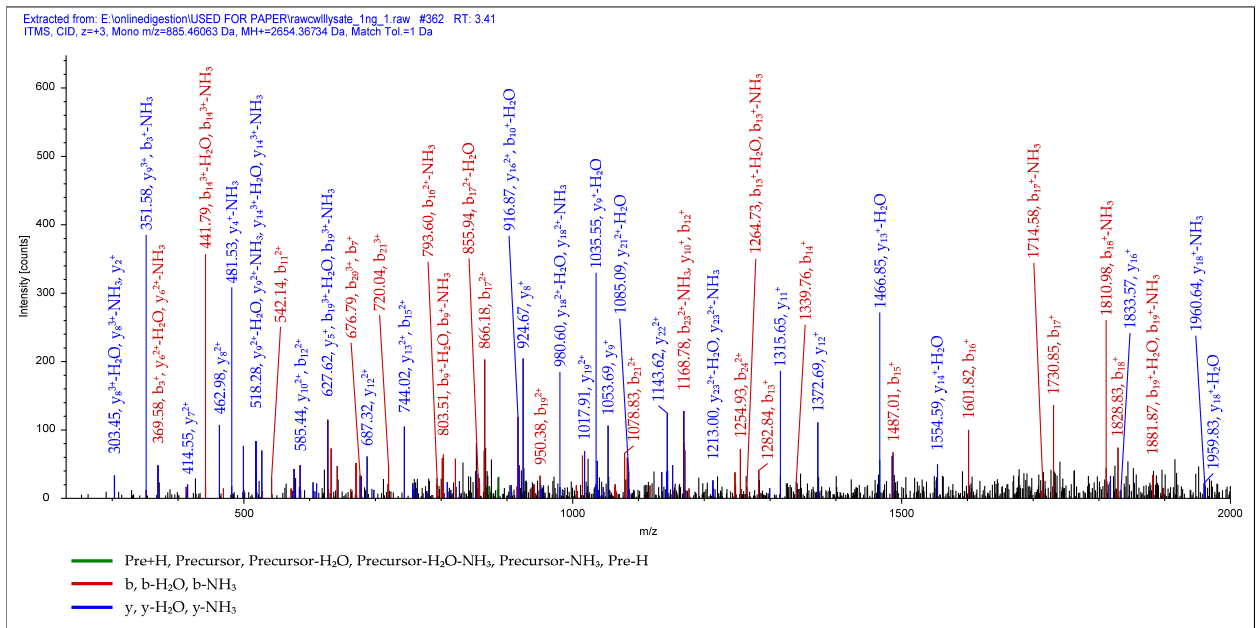

### 3 ng RAW 264.7 cell lysate\_2nd run

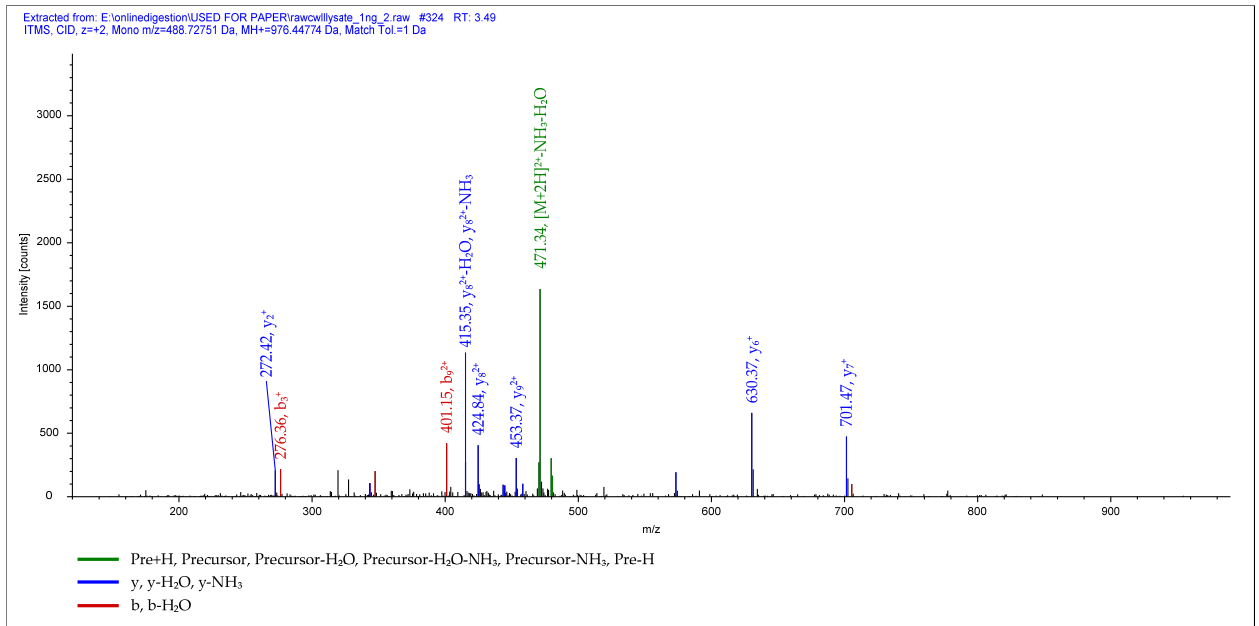

Extracted from: E:\onlinedigestion\USED FOR PAPER\rawcowllylate\_1ng\_2.raw #252 RT: 2.94  
ITMS, CID, z=+2, Mono m/z=622.83630 Da, MH+=1244.66533 Da, Match Tol.=1 Da

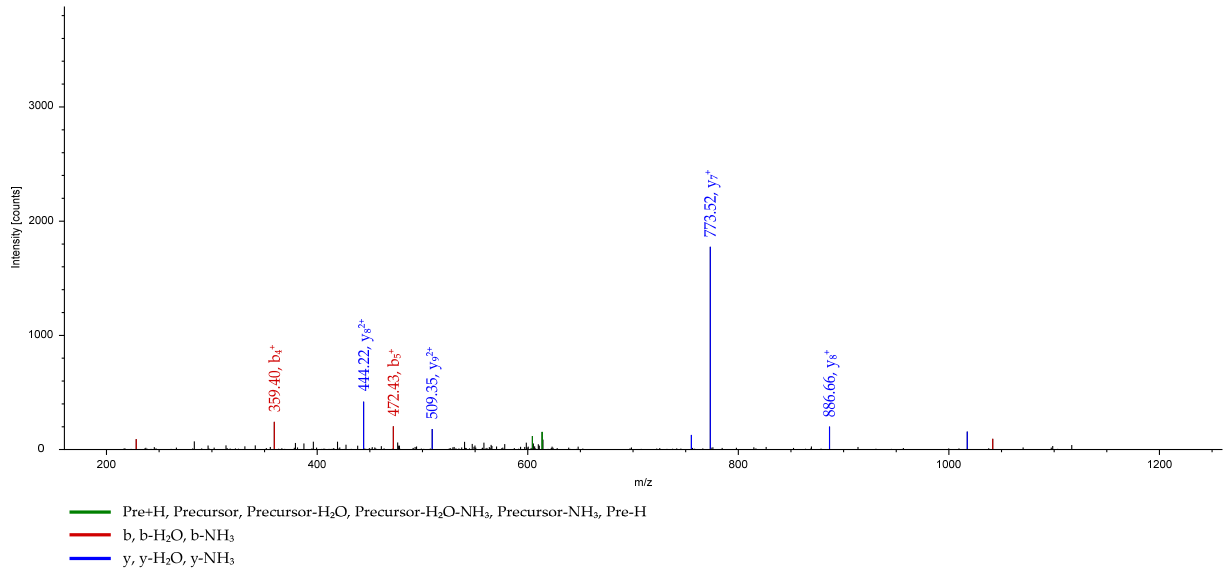

Extracted from: E:\onlinedigestion\USED FOR PAPER\rawcowllylate\_1ng\_2.raw #296 RT: 3.29  
ITMS, CID, z=+2, Mono m/z=565.80573 Da, MH+=1130.60417 Da, Match Tol.=1 Da

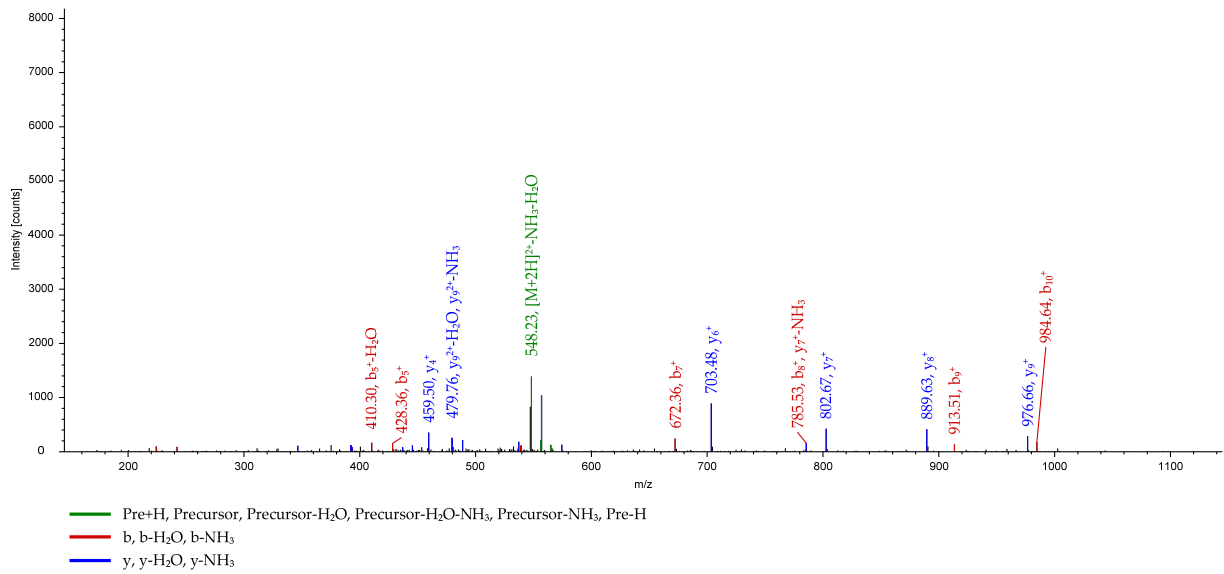

Extracted from: E:\onlinedigestion\USED FOR PAPER\rawcwllylsate\_1ng\_2.raw #401 RT: 4.35  
ITMS, CID, z=+3, Mono m/z=897.74463 Da, MH+=2691.21933 Da, Match Tol.=1 Da

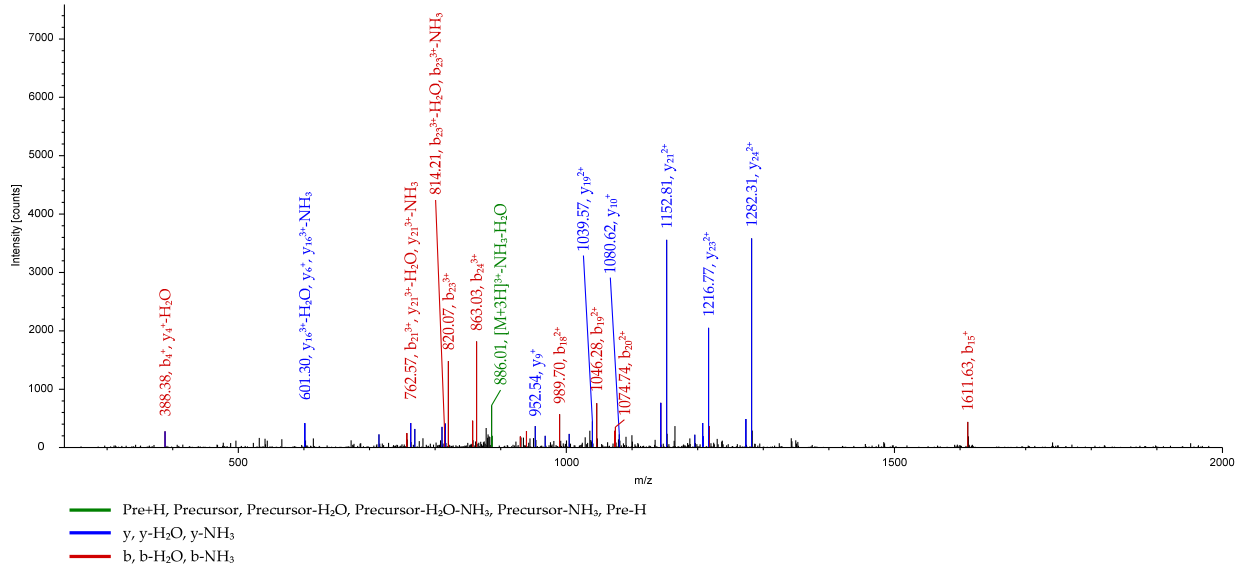

Extracted from: E:\onlinedigestion\USED FOR PAPER\rawcwllylsate\_1ng\_2.raw #303 RT: 3.33  
ITMS, CID, z=+3, Mono m/z=943.80841 Da, MH+=2829.41068 Da, Match Tol.=1 Da

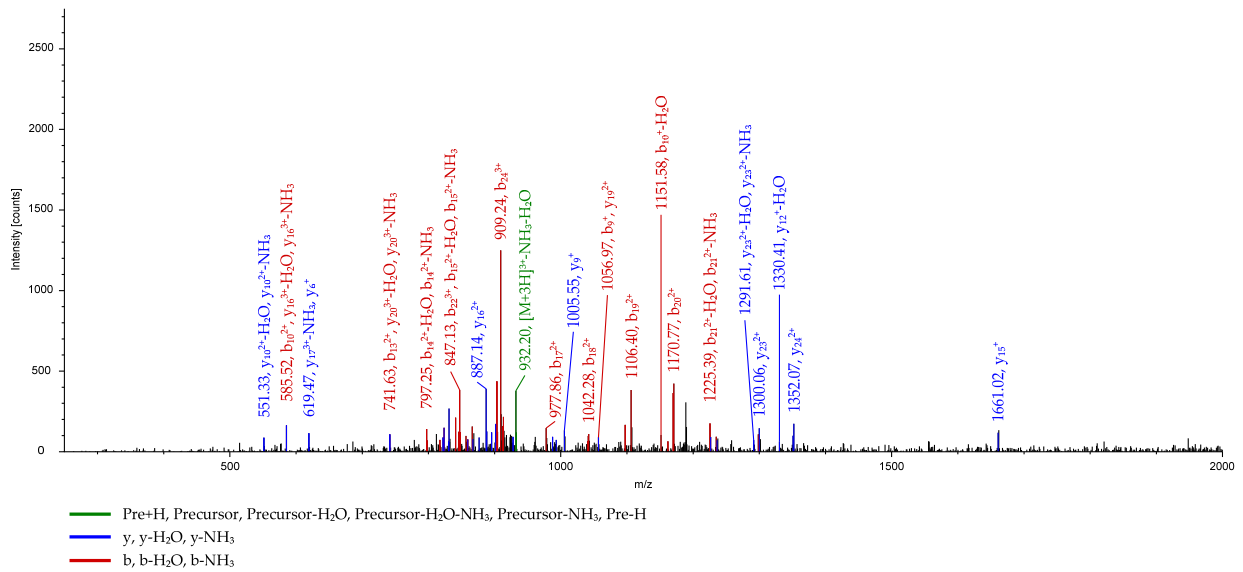

Extracted from: E:\onlinedigestion\USED FOR PAPER\rawcowllylsate\_1ng\_2.raw #404 RT: 4.36  
ITMS, CID, z=+3, Mono m/z=943.80865 Da, MH+=2829.41141 Da, Match Tol.=1 Da

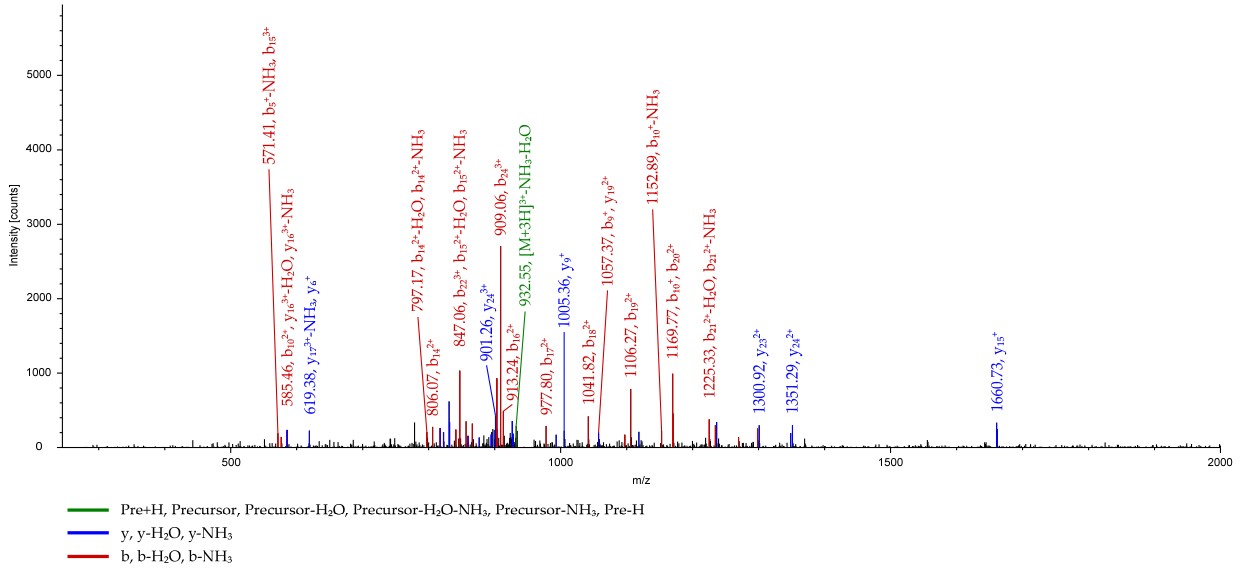

Extracted from: E:\onlinedigestion\USED FOR PAPER\rawcowllylsate\_1ng\_2.raw #229 RT: 2.78  
ITMS, CID, z=+2, Mono m/z=644.34680 Da, MH+=1287.68633 Da, Match Tol.=1 Da

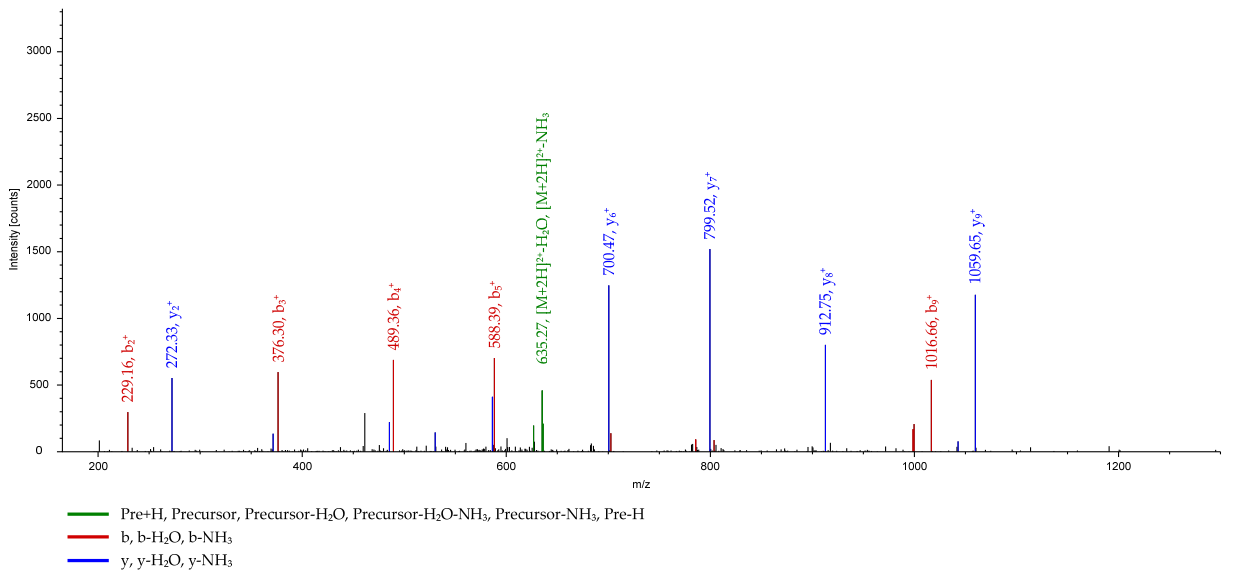



Extracted from: E:\onlinedigestion\USED FOR PAPER\rawcwllylate\_1ng\_2.raw #298 RT: 3.30  
ITMS, CID, z=+2, Mono m/z=644.34729 Da, MH+=1287.68730 Da, Match Tol.=1 Da

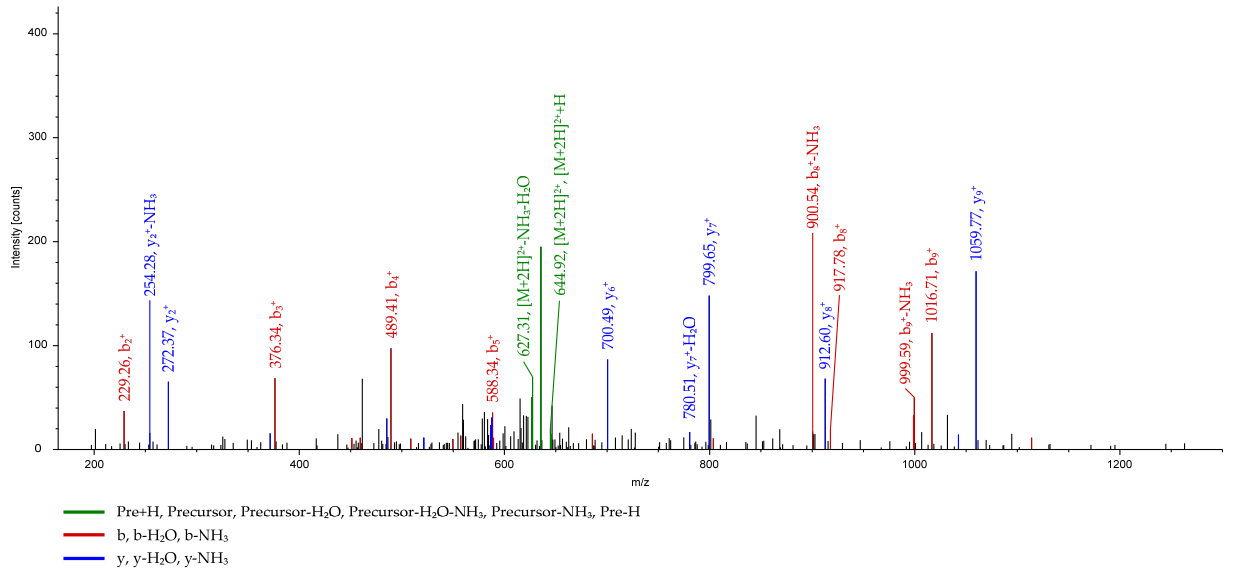

Extracted from: E:\onlinedigestion\USED FOR PAPER\rawcwllylate\_1ng\_2.raw #280 RT: 3.13  
ITMS, CID, z=+2, Mono m/z=702.93237 Da, MH+=1404.85747 Da, Match Tol.=1 Da

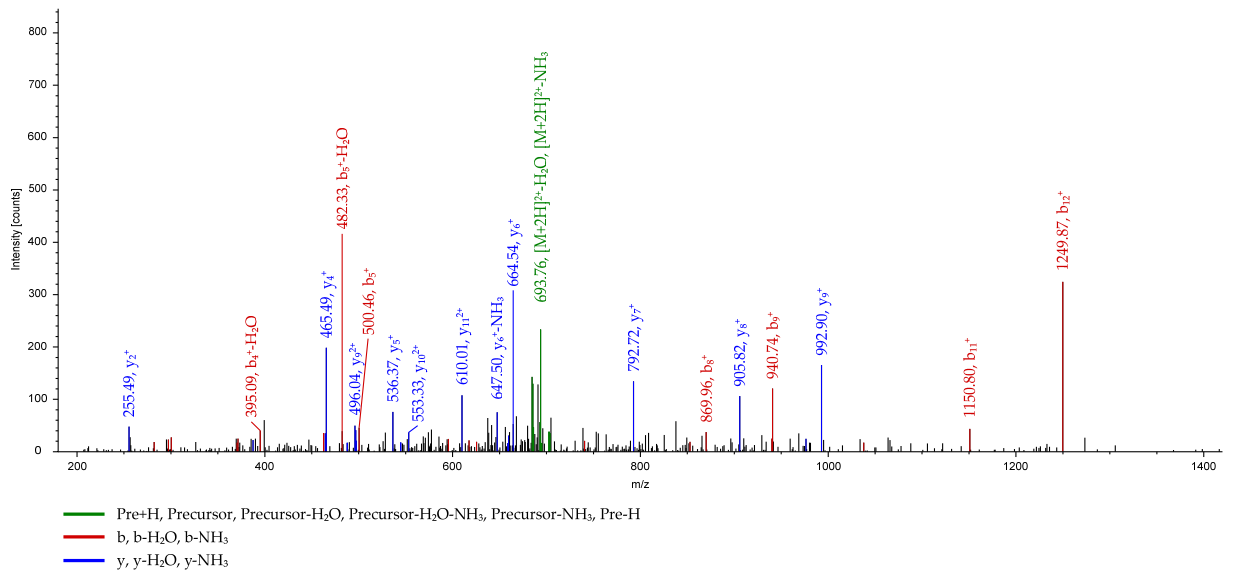

Extracted from: E:\onlinedigestion\USED FOR PAPER\rawcwllysat\_1ng\_2.raw #409 RT: 4.40  
ITMS, CID, z=+3, Mono m/z=901.11011 Da, MH+=2701.31577 Da, Match Tol.=1 Da

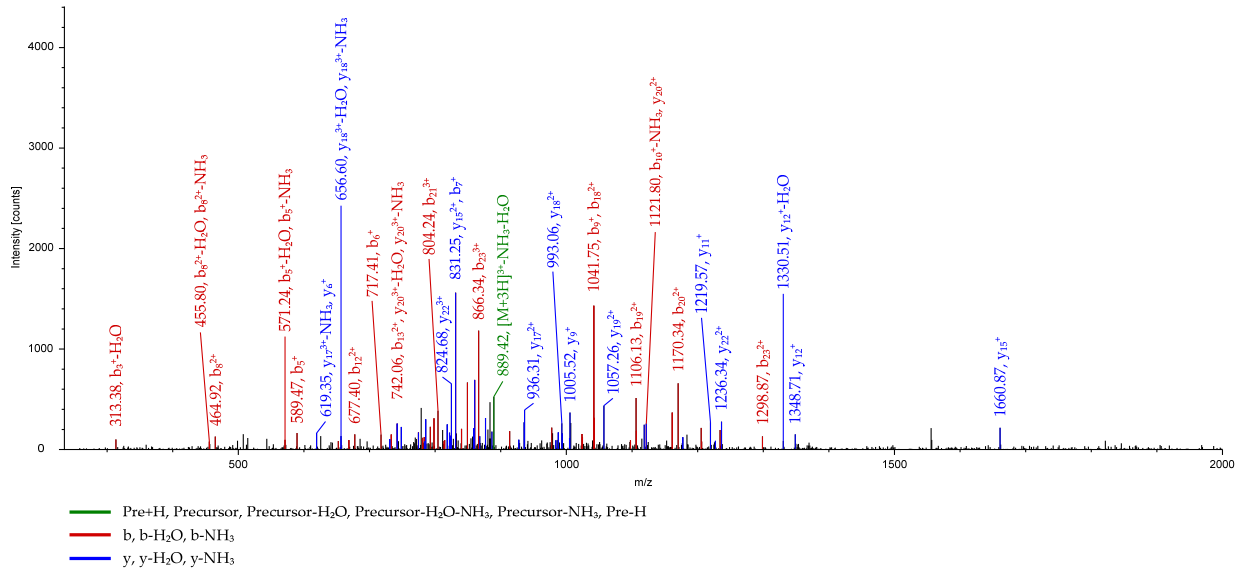

Extracted from: E:\onlinedigestion\USED FOR PAPER\rawcwllysat\_1ng\_2.raw #217 RT: 2.71  
ITMS, CID, z=+2, Mono m/z=735.93475 Da, MH+=1470.86223 Da, Match Tol.=1 Da

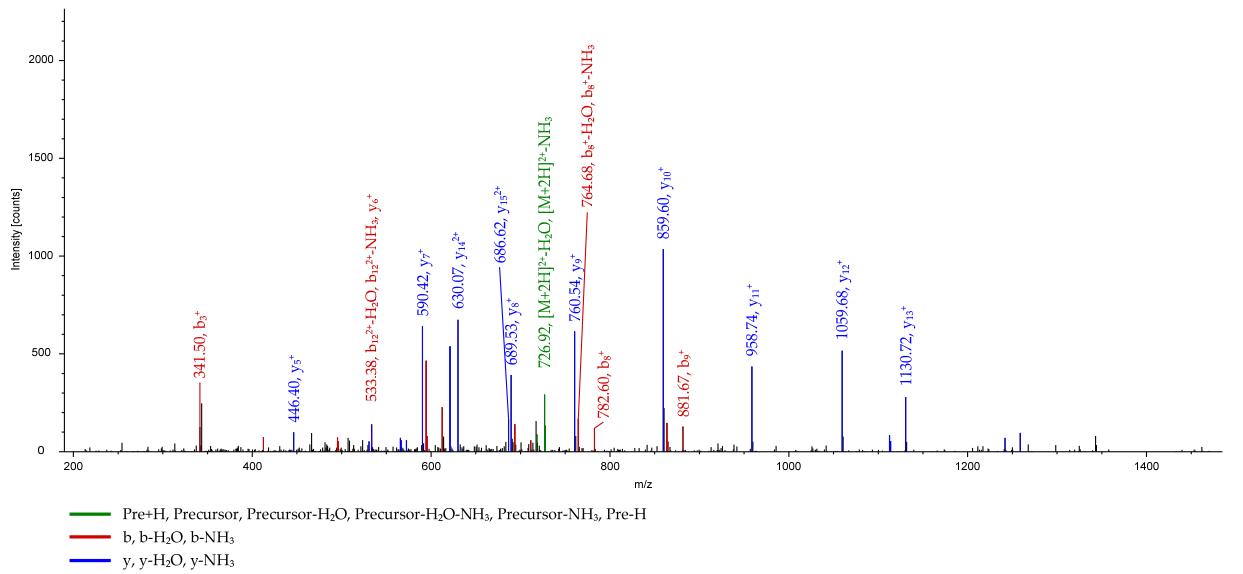

### 3 ng RAW 264.7 cell lysate\_3rd run

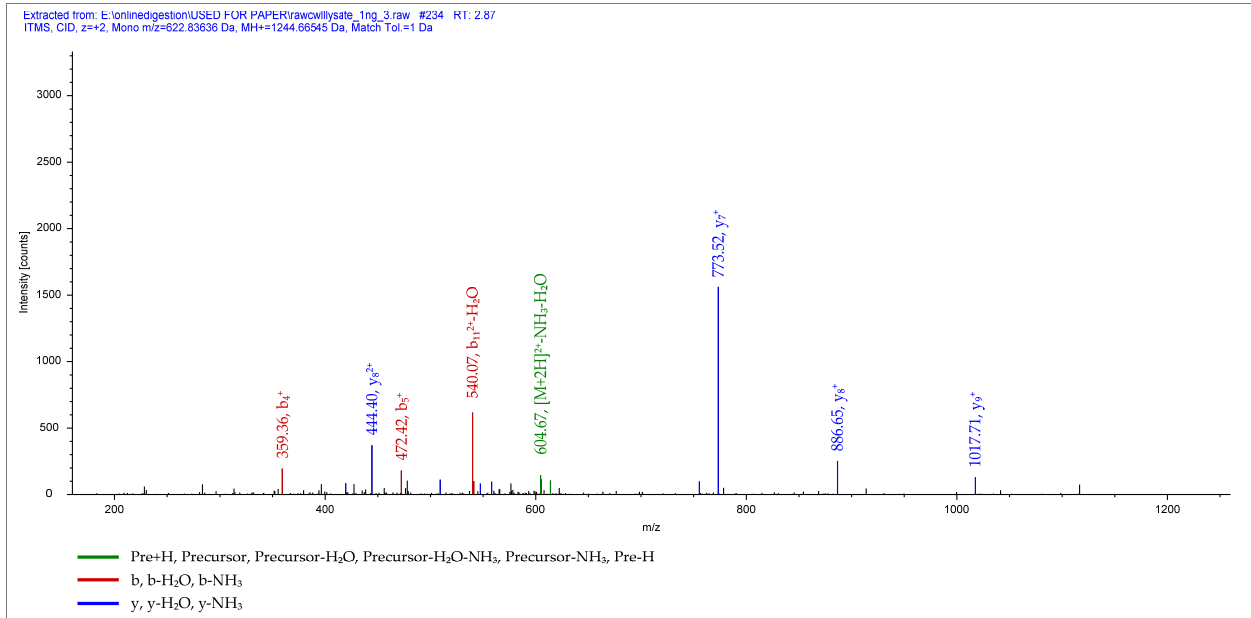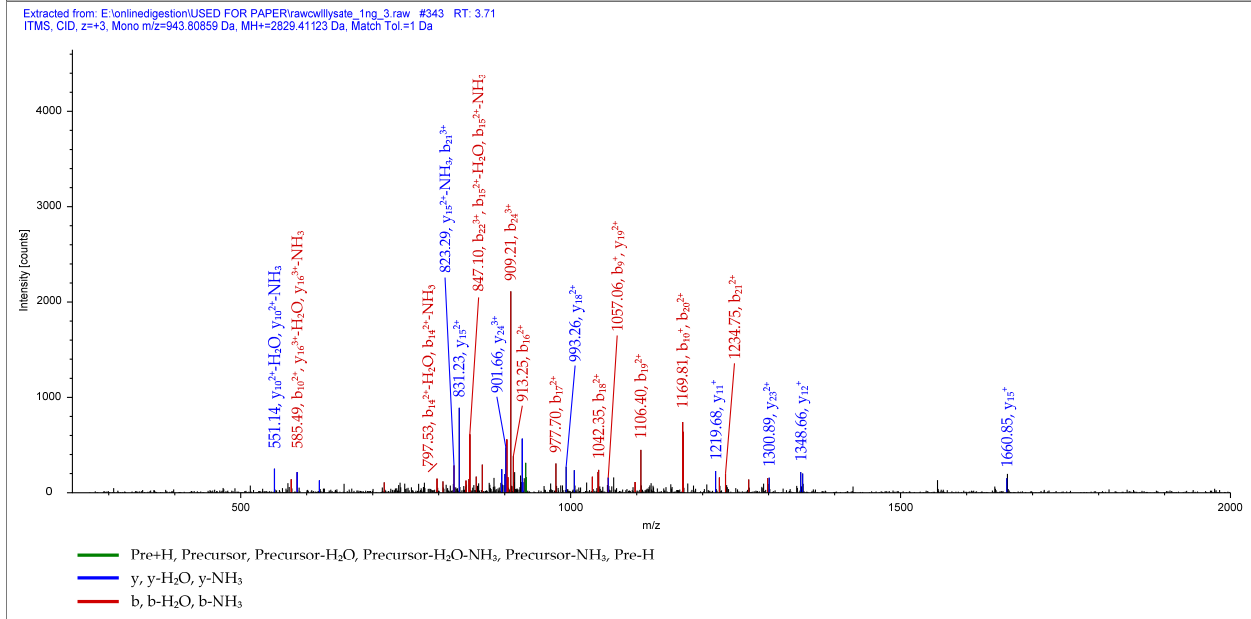

Extracted from: E:\onlinedigestion\USED FOR PAPER\rawcwllylate\_1ng\_3\_raw #267 RT: 3.12  
ITMS, CID, z=+2, Mono m/z=644.34692 Da, MH+=1287.68657 Da, Match Tol.=1 Da

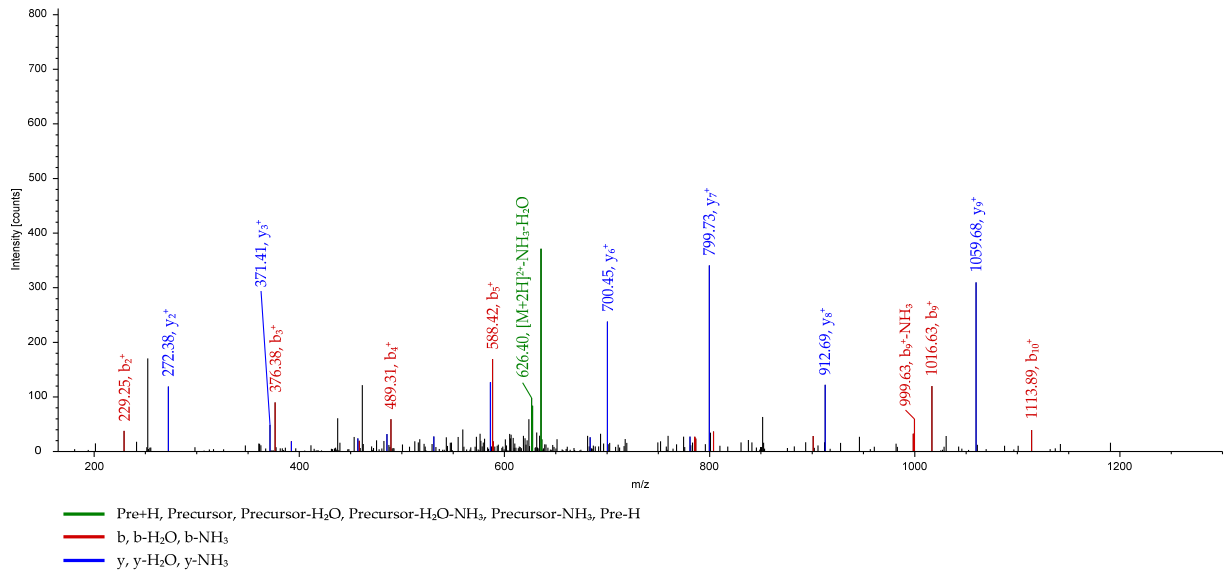

Extracted from: E:\onlinedigestion\USED FOR PAPER\rawcwllylate\_1ng\_3\_raw #196 RT: 2.60  
ITMS, CID, z=+2, Mono m/z=644.34698 Da, MH+=1287.68669 Da, Match Tol.=1 Da

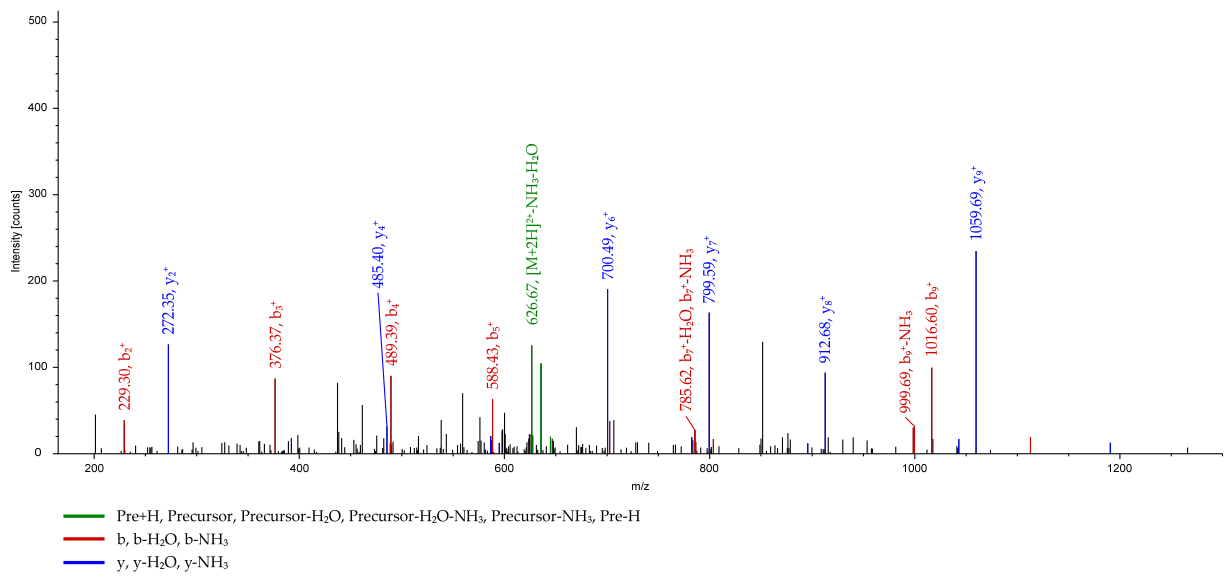

Extracted from: E:\onlinedigestion\USED FOR PAPER\rawcwllylsate\_1ng\_3.raw #332 RT: 3.61  
ITMS, CID, z=+3, Mono m/z=1027.53162 Da, MH+=3080.58030 Da, Match Tol.=1 Da

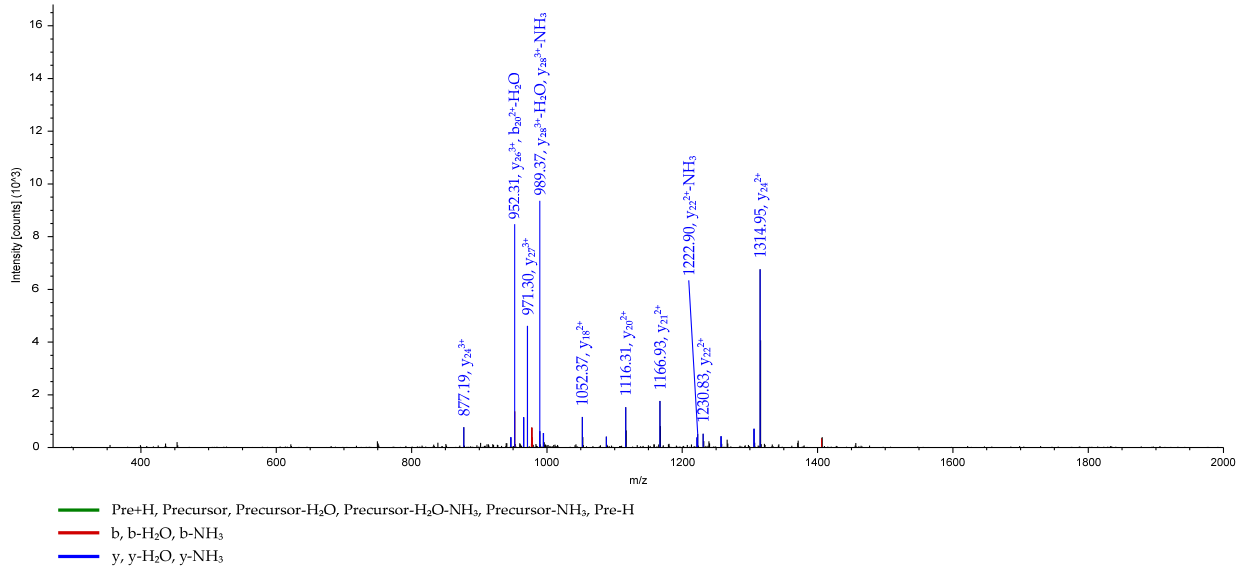

Extracted from: E:\onlinedigestion\USED FOR PAPER\rawcwllylsate\_1ng\_3.raw #209 RT: 2.70  
ITMS, CID, z=+2, Mono m/z=735.93506 Da, MH+=1470.86284 Da, Match Tol.=1 Da

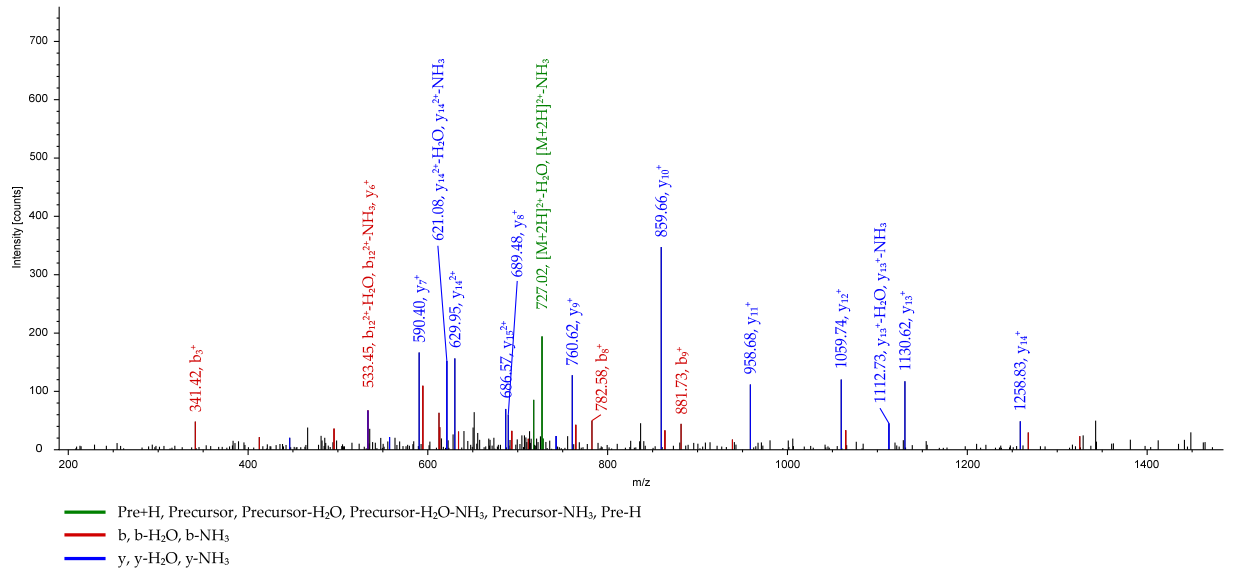

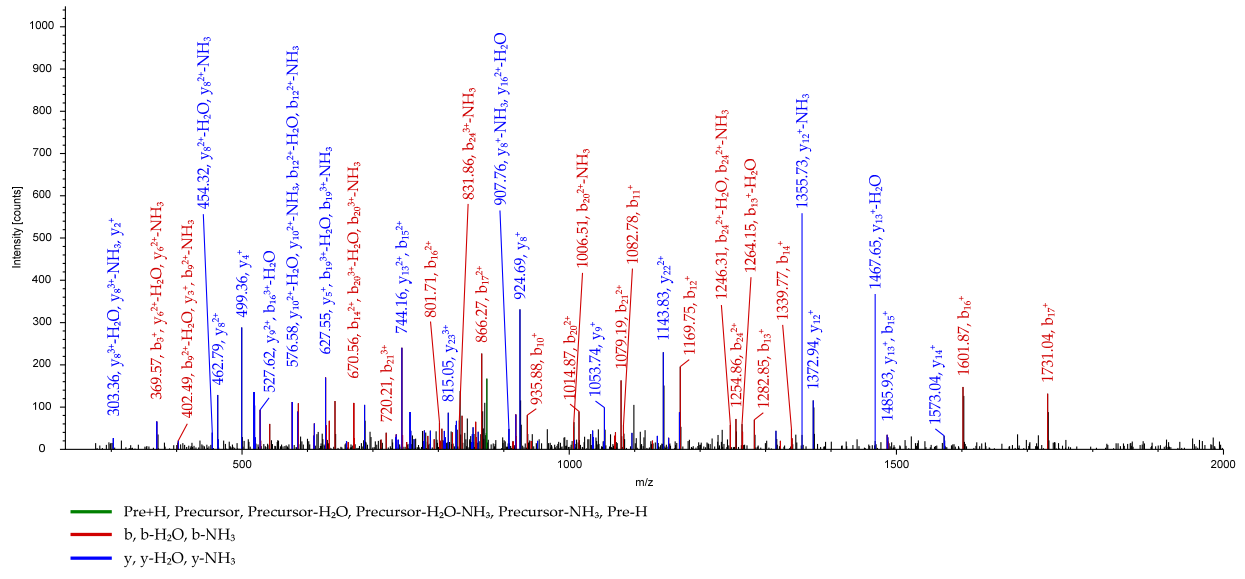

Supplement: NIHMS459362-supplement-2_si_002.pdf [file NIHMS459362-supplement-2_si_002.pdf]
